# Supplementary material for: The catalytic-dead Pcif1 regulates gene expression and fertility in Drosophila
Source: PubMed Central journal article supplement — RNA. 2023 May;29(5):609–19. doi: 10.1261/rna.079192.122 (PMC10158991; doi:10.1261/rna.079192.122), 2023-05
Supplement: supp_079192.122_Supplemental_Table_1.pdf [file supp_079192.122_Supplemental_Table_1.pdf]

**proton transport (GO:0015992) genes:**

| gene        | gene_biotype   | chr | external_gene_name | description                                        | RR1044  | RR1045  |
|-------------|----------------|-----|--------------------|----------------------------------------------------|---------|---------|
| FBgn0010217 | protein_coding | 4   | ATPsynbeta         | ATP synthase, beta subunit                         | 28843,4 | 28424,8 |
| FBgn0010612 | protein_coding | 2L  | ATPsynG            | ATP synthase                                       | 2469,9  | 2540,3  |
| FBgn0011211 | protein_coding | 2R  | blw                | bellwether                                         | 24277,9 | 23992,1 |
| FBgn0014391 | protein_coding | X   | sun                | stunted                                            | 2259,6  | 2213,5  |
| FBgn0016119 | protein_coding | 3R  | ATPsynCF6          | ATP synthase, coupling factor 6                    | 2532,9  | 2545,8  |
| FBgn0016120 | protein_coding | 3R  | ATPsynD            | ATP synthase, subunit D                            | 3126,4  | 3281,3  |
| FBgn0016691 | protein_coding | 3R  | ATPsynO            | ATP synthase, oligomycin sensitivity conferring pr | 3673,6  | 3635,8  |
| FBgn0019644 | protein_coding | 3L  | ATPsynB            | ATP synthase, subunit B                            | 3755,2  | 4137,4  |
| FBgn0020235 | protein_coding | 3R  | ATPsyngamma        | ATP synthase, gamma subunit                        | 5172,6  | 5073,8  |
| FBgn0028342 | protein_coding | X   | ATPsyndelta        | ATP synthase, delta subunit                        | 3156,4  | 2836,0  |
| FBgn0030872 | protein_coding | X   | Ucp4A              |                                                    | 664,6   | 727,8   |
| FBgn0031757 | protein_coding | 2L  | Ucp4C              |                                                    | 3,3     | 3,2     |
| FBgn0031758 | protein_coding | 2L  | Ucp4B              | Uncoupling protein 4B                              | 0,0     | 0,0     |
| FBgn0034081 | protein_coding | 2R  | CG10731            |                                                    | 200,3   | 212,1   |
| FBgn0035032 | protein_coding | 2R  | ATPsynF            | ATP synthase, subunit F                            | 1845,1  | 2008,2  |
| FBgn0036568 | protein_coding | 3L  | ATPsynbetaL        | ATP synthase, beta subunit-like                    | 0,0     | 0,0     |
| FBgn0038224 | protein_coding | 3R  | ATPsynE            | ATP synthase, subunit E                            | 2441,0  | 2527,3  |
| FBgn0039830 | protein_coding | 3R  | ATPsynC            | ATP synthase, subunit C                            | 26798,2 | 26891,8 |
| FBgn0051477 | protein_coding | 3R  | ATPsynepsilonL     | ATP synthase, epsilon subunit-like                 | 0,0     | 0,0     |
| FBgn0259111 | protein_coding | 2L  | Ndae1              | Na[+]-driven anion exchanger 1                     | 193,6   | 533,8   |
| FBgn0262511 | protein_coding | 2R  | Vha44              | Vacuolar H[+] ATPase 44kD subunit                  | 5115,8  | 5355,5  |
| FBgn0284252 | protein_coding | 2R  | Letm1              | Leucine zipper and EF-hand containing transmem     | 2948,4  | 2882,8  |

**Gene ontology analysis of GO:0015992 genes :**

|                                              | Overlap* | Adj.P.value | Significantly upregulated genes                                                      |
|----------------------------------------------|----------|-------------|--------------------------------------------------------------------------------------|
| upregulated in <b>Pcif1<sup>M6stop</sup></b> | 13/23    | 3,45E-13    | ATPsynbeta;Letm1;ATPsyndelta;Vha44;ATPsynCF6;ATPsyngamma;blw;ATPsynO;ATPsynD;ATPsynE |
| upregulated <b>Pcif1<sup>F9ΔNLS</sup></b>    | 12/23    | 2,88E-06    | ATPsynD;ATPsynbeta;Letm1;ATPsyndelta;ATPsynC;ATPsynF;ATPsynE;ATPsynCF6;ATPsyngamma   |

\* upregulated genes/all genes

|         |         |         |         |         |         |         |          | logFC (vs. control)     |                         | padj (vs. control)      |                         |
|---------|---------|---------|---------|---------|---------|---------|----------|-------------------------|-------------------------|-------------------------|-------------------------|
| RR1046  | RR1047  | RR1048  | RR1049  | RR1050  | RR1051  | RR1052  | baseMean | Pcif1 <sup>M6stop</sup> | Pcif1 <sup>F9ΔNLS</sup> | Pcif1 <sup>M6stop</sup> | Pcif1 <sup>F9ΔNLS</sup> |
| 25709,5 | 34264,7 | 33979,5 | 38330,4 | 34238,7 | 33940,4 | 33496,3 | 32358,63 | 0,34                    | 0,28                    | 0,00                    | 0,00                    |
| 2257,3  | 2444,4  | 2603,1  | 2921,0  | 2669,0  | 2421,5  | 2579,0  | 2545,05  | 0,09                    | 0,07                    | 0,50                    | 0,58                    |
| 20817,4 | 29947,7 | 26832,3 | 28081,5 | 30412,1 | 28490,3 | 28122,4 | 26774,86 | 0,27                    | 0,31                    | 0,00                    | 0,00                    |
| 2444,1  | 2515,5  | 2442,4  | 2946,1  | 2564,3  | 2589,0  | 2459,4  | 2492,65  | 0,14                    | 0,12                    | 0,24                    | 0,26                    |
| 2395,1  | 2951,5  | 2890,4  | 3355,8  | 3306,6  | 2868,5  | 2979,6  | 2869,60  | 0,26                    | 0,27                    | 0,01                    | 0,00                    |
| 3097,1  | 3794,0  | 3894,7  | 4387,2  | 4420,6  | 4195,9  | 4116,4  | 3812,61  | 0,32                    | 0,40                    | 0,00                    | 0,00                    |
| 3415,9  | 3950,0  | 3953,3  | 4403,5  | 4028,1  | 3977,7  | 3893,0  | 3881,21  | 0,18                    | 0,14                    | 0,03                    | 0,06                    |
| 3514,5  | 4397,8  | 4460,3  | 5069,0  | 4627,5  | 4447,2  | 4396,3  | 4311,69  | 0,25                    | 0,22                    | 0,02                    | 0,02                    |
| 4697,2  | 5883,3  | 5749,2  | 6283,7  | 6270,5  | 6244,0  | 5716,8  | 5676,80  | 0,24                    | 0,27                    | 0,00                    | 0,00                    |
| 2871,7  | 3434,1  | 3338,0  | 3781,9  | 3502,2  | 3518,1  | 3342,9  | 3309,02  | 0,22                    | 0,21                    | 0,01                    | 0,01                    |
| 729,4   | 752,1   | 892,4   | 791,2   | 645,7   | 748,5   | 785,4   | 748,58   | 0,11                    | 0,03                    | 0,42                    | 0,86                    |
| 5,2     | 0,9     | 6,4     | 3,4     | 5,0     | 3,1     | 1,7     | 3,58     | 0,00                    | -0,01                   | 0,98                    | 0,90                    |
| 0,0     | 0,0     | 0,0     | 0,0     | 0,0     | 0,0     | 0,0     | 0,00     | NA                      | NA                      | NA                      | NA                      |
| 179,4   | 215,4   | 181,5   | 196,3   | 135,8   | 158,6   | 158,4   | 181,99   | 0,00                    | -0,30                   | 0,99                    | 0,07                    |
| 1773,2  | 2378,9  | 2290,6  | 2610,3  | 2575,9  | 2498,3  | 2224,6  | 2245,02  | 0,33                    | 0,35                    | 0,00                    | 0,00                    |
| 0,0     | 0,0     | 1,3     | 0,0     | 0,8     | 0,0     | 0,8     | 0,33     | 0,00                    | 0,01                    | NA                      | NA                      |
| 2295,5  | 2550,9  | 2800,5  | 3014,5  | 3068,1  | 3009,8  | 3021,3  | 2747,67  | 0,16                    | 0,32                    | 0,10                    | 0,00                    |
| 26291,5 | 31745,0 | 31516,4 | 34832,4 | 35786,6 | 34329,6 | 32940,0 | 31236,83 | 0,28                    | 0,36                    | 0,00                    | 0,00                    |
| 1,2     | 0,0     | 2,3     | 0,0     | 4,2     | 0,0     | 1,5     | 1,01     | 0,00                    | 0,01                    | NA                      | NA                      |
| 244,7   | 311,8   | 911,7   | 684,7   | 324,5   | 454,7   | 531,2   | 465,64   | 0,06                    | 0,10                    | 0,24                    | 0,54                    |
| 4743,5  | 5447,7  | 6755,8  | 6699,9  | 5726,1  | 6322,6  | 5568,5  | 5748,37  | 0,25                    | 0,19                    | 0,04                    | 0,11                    |
| 2669,3  | 3323,7  | 3622,7  | 3307,0  | 3513,4  | 3411,6  | 3484,8  | 3240,43  | 0,25                    | 0,28                    | 0,00                    | 0,00                    |

ynC;ATPsynF;ATPsynE;ATPsynB

Δ;blw;ATPsynO;ATPsynB
